# Supplementary material for: Interplay of Objective Sleep Duration and Cardiovascular and Cerebrovascular Diseases on Cause‐Specific Mortality
Source: PubMed Central journal article supplement — J Am Heart Assoc. 2019 Oct 2;8(20):e013043. doi: 10.1161/JAHA.119.013043 (PMC6818044; doi:10.1161/jaha.119.013043), 2019-10-02
Supplement: JAH3-8-e013043-s001.pdf [file JAH3-8-e013043-s001.pdf]

# **SUPPLEMENTAL MATERIAL**

**Table S1. Projected multivariable-adjusted mortality rates associated with cardiometabolic risk factors (CMR) and cardio-cerebrovascular disease (CBVD): role of objective sleep duration.**

|                       | All-cause mortality rate (%) at |                  |
|-----------------------|---------------------------------|------------------|
|                       | 15 years                        | 20 years         |
| Reference $\geq$ 6h   | 6.5 (4.4-8.6)                   | 12.7 (8.8-16.4)  |
| Reference < 6h        | 6.0 (3.9-7.9)                   | 11.6 (8.9-15.2)  |
| CMR or CBVD $\geq$ 6h | 9.9 (7.7-12.1)                  | 19.1 (15.2-22.7) |
| CMR or CBVD < 6h      | 13.5 (10.7-16.1)                | 25.4 (21.0-29.6) |
| Reference $\geq$ 6h   | 6.4 (4.3-8.5)                   | 12.7 (8.8-16.5)  |
| Reference < 6h        | 6.0 (3.9-8.0)                   | 11.8 (8.0-15.4)  |
| CMR $\geq$ 6h         | 8.8 (6.6-11.0)                  | 17.3 (13.3-21.0) |
| CMR < 6h              | 12.2 (9.5-14.8)                 | 23.4 (19.0-27.5) |
| CBVD $\geq$ 6h        | 14.4 (9.4-19.2)                 | 27.3 (18.6-35.1) |
| CBVD < 6h             | 17.8 (13.0-22.3)                | 33.0 (25.2-39.9) |
|                       | CBVD mortality rate (%) at      |                  |
|                       | 15 years                        | 20 years         |
| Reference $\geq$ 6h   | 2.3 (1.0-3.6)                   | 4.0 (1.7-6.2)    |
| Reference < 6h        | 2.1 (0.9-3.3)                   | 3.7 (1.7-5.6)    |
| CMR or CBVD $\geq$ 6h | 4.1 (2.5-5.6)                   | 7.0 (4.6-9.4)    |
| CMR or CBVD < 6h      | 4.8 (3.0-6.5)                   | 8.2 (5.4-11.0)   |
| Reference $\geq$ 6h   | 2.3 (1.0-3.6)                   | 4.0 (1.7-6.3)    |
| Reference < 6h        | 2.2 (1.0-3.4)                   | 3.9 (1.8-5.9)    |
| CMR $\geq$ 6h         | 3.1 (1.8-4.5)                   | 5.5 (3.2-7.6)    |
| CMR < 6h              | 4.0 (2.4-5.5)                   | 7.0 (4.4-9.5)    |
| CBVD $\geq$ 6h        | 8.0 (4.0-11.9)                  | 13.8 (7.2-19.9)  |
| CBVD < 6h             | 8.1 (4.5-11.6)                  | 13.9 (8.1-19.4)  |
|                       | Cancer mortality rate (%) at    |                  |
|                       | 15 years                        | 20 years         |
| Reference $\geq$ 6h   | 2.6 (1.2-3.9)                   | 5.7 (3.0-8.3)    |
| Reference < 6h        | 1.2 (0.3-2.1)                   | 2.7 (0.8-4.6)    |
| CMR or CBVD $\geq$ 6h | 2.2 (1.2-3.2)                   | 5.0 (3.0-7.1)    |
| CMR or CBVD < 6h      | 3.2 (1.8-4.6)                   | 7.0 (4.4-9.6)    |
| Reference $\geq$ 6h   | 2.6 (1.2-3.9)                   | 5.7 (2.9-8.4)    |
| Reference < 6h        | 1.2 (0.3-2.1)                   | 2.7 (0.8-4.7)    |
| CMR $\geq$ 6h         | 2.5 (1.3-3.7)                   | 5.6 (3.1-8.0)    |
| CMR < 6h              | 3.0 (1.5-4.4)                   | 6.6 (3.7-9.5)    |
| CBVD $\geq$ 6h        | 1.4 (0.0-2.9)                   | 3.2 (0.0-6.3)    |
| CBVD < 6h             | 3.5 (1.3-12.3)                  | 7.8 (3.1-12.3)   |

The reference group was absent of CMR and CBVD. All data adjusted for age, race, sex, education, BMI, smoking, alcohol use, AHI, other physical health conditions, and mental health conditions

**Table S2. Hazard ratios and 95% confidence intervals for cancer mortality associated with cardiometabolic risk factors (CMR) and cardio-cerebrovascular disease (CBVD) among subjects free of cancer at baseline: role of objective sleep duration.**

| N=1,505          | <b>n</b> | <b>Overall</b>   | <b>≥ 6 hours</b> | <b>&lt; 6 hours</b> |
|------------------|----------|------------------|------------------|---------------------|
| <b>Reference</b> | 29       | 1.00             | 1.00             | 1.00                |
| <b>CMR</b>       | 66       | 1.56 (0.96-2.55) | 1.12 (0.60-2.10) | 2.61 (1.15-5.92)*   |
| <b>CBVD</b>      | 19       | 1.62 (0.86-3.05) | 0.48 (0.14-1.69) | 3.62 (1.47-8.93)*   |

The reference group was absent of CMR and CBVD. Hazard ratios adjusted for age, race, sex, education, BMI, smoking, alcohol use, AHI, physical health conditions, and mental health conditions; n = number of deaths from cancer (among a total of 1,505 subjects without cancer at baseline, 114 died of cancer, 29 in the reference group, 66 in the CMR group and 19 in the CBVD group) \* P < 0.05
